# Supplementary material for: Age-Related Changes in HAPLN1 Increase Lymphatic Permeability and Affect Routes of Melanoma Metastasis
Source: Oxford University Press journal article supplement (doi:10.1158/2159-8290.cd-18-0168), 2018-10-02
Supplement: 21598290cd180168-sup-197277_2_supp_5012853_pjn4jn.docx [file 21598290cd180168-sup-197277_2_supp_5012853_pjn4jn.docx]

**Supplemental Table 1.** Multivariable Cox Regression Model for overall survival in 1081 patients (event=131) undergoing SNB.

| **Parameter** | **Comparison** | **HR*** | **95% CI** | **P value** |
| --- | --- | --- | --- | --- |
| T-stage | T1 | Ref | Ref | **-** |
| T2: 1.01-2.00 | 2.05 | 1.15-3.64 | 0.015 |
| T3:2.01-4.00 | 1.83 | 0.98-3.41 | 0.057 |
| T4: >4 | 4.5 | 2.37-8.53 | <0.001 |
| Unknown | 3.65 | 1.03-13.01 | 0.046 |
| Ulceration | No | Ref | Ref | - |
| Yes | 1.9 | 1.29-2.82 | 0.001 |
| Unknown | 0.5 | 0.12-2.18 | 0.358 |
| # positive SLN | As 1 unit increase | 2.31 | 1.86-2.87 | <0.001 |
| Log(hottest excised) | As 1 log unit increase | 0.8 | 0.70-0.91 | 0.001 |

*Hazard ratio (HR) indicates relative hazard for death and was adjusted for all variables included

**Supplemental Table 2.** Multivariable Cox Regression Model for distant metastatic-free survival in non-metastatic melanoma patients (n=1,649)

| **Parameter** | **Comparison** | **HR*** | **95% CI** | **p-value** |
| --- | --- | --- | --- | --- |
| Age, years | *<50* | Ref | Ref | 0.045 |
| *≥50* | *1.49* | 1.01-2.20 |
| Ulceration | No | Ref | Ref | <0.001 |
| Yes | 2.44 | 1.61-3.68 |
| Lymphovascular invasion | No | Ref | Ref | 0.065 |
| Yes | 1.79 | 0.97-3.33 |
| Breslow depth, mm (increasing) | | 1.16 | 1.10-1.22 | <0.001 |
